# Supplementary material for: A novel microporous hydrogen-bonded organic framework with electron-rich alkynyl groups for highly efficient C 2 H 6 /C 2 H 4 separation
Source: Royal Society of Chemistry journal article supplement (doi:10.1039/d4ta04528a), 2024-01-01
Supplement: d4ta04528a1.pdf [file d4ta04528a1.pdf]

## Supporting Information†

### **A novel microporous hydrogen-bonded framework with electron-rich alkynyl groups for highly efficient C<sub>2</sub>H<sub>6</sub>/C<sub>2</sub>H<sub>4</sub> separation**

Yu-Bo Wang<sup>a</sup>, Teng-Fei Zhang<sup>a</sup>, Yu-Xin Lin<sup>a</sup>, Jia-Xin Wang<sup>a</sup>, Hui-Min Wen<sup>b</sup>, Xu Zhang<sup>\*c</sup>,  
Guodong Qian<sup>a</sup> and Bin Li<sup>\*a</sup>

<sup>a</sup> State Key Laboratory of Silicon and Advanced Semiconductor Materials, School of Materials Science and Engineering, Zhejiang University, Hangzhou 310027, China

E-mail: bin.li@zju.edu.cn

<sup>b</sup> College of Chemical Engineering, Zhejiang University of Technology Hangzhou 310014, China

<sup>c</sup> Jiangsu Engineering Laboratory for Environmental Functional Materials School of Chemistry and Chemical Engineering, Huaiyin Normal University, Huaian 223300, China

E-mail: zhangxu@hytc.edu.cn

## **Table of Contents**

Supplementary Experimental Section

Supplementary Tables S1–S4

Supplementary Figures S1–S27

Supplementary References

## Supplementary Experimental Section

### 1. Fitting of pure component isotherms

The experimentally measured loadings for C<sub>2</sub>H<sub>6</sub> and C<sub>2</sub>H<sub>4</sub> measured at temperatures of 296 K, ZJU-HOF-60a were fitted with the dual-Langmuir-Freundlich isotherm model:

$$q = q_{A,sat} \frac{b_A p^{v_A}}{1 + b_A p^{v_A}} + q_{B,sat} \frac{b_B p^{v_B}}{1 + b_B p^{v_B}} \quad (1)$$

with T-dependent parameters  $b_A$ , and  $b_B$

$$b_A = b_{A0} \exp\left(\frac{E_A}{RT}\right); b_B = b_{B0} \exp\left(\frac{E_B}{RT}\right) \quad (2)$$

The parameters are provided in Table S3.

### 2. Virial Graph Analysis

Estimation of isosteric heats of gas adsorption ( $Q_{st}$ )

A virial-type expression comprising the temperature-independent parameters  $a_i$  and  $b_j$  was employed to calculate the enthalpies of adsorption for C<sub>2</sub>H<sub>6</sub> and C<sub>2</sub>H<sub>4</sub> (at 273 K, 296 K, and 313 K) on ZJU-HOF-60a. In each case, the data were fitted using the equation:

$$\ln P = \ln N + 1/T \sum_{i=1}^m a_i N_i + \sum_{j=1}^n b_j N_j \quad (3)$$

Here,  $P$  is the pressure expressed in mmHg,  $N$  is the amount absorbed in mmol g<sup>-1</sup>,  $T$  is the temperature in K,  $a_i$  and  $b_j$  are virial coefficients, and  $m$ ,  $n$  represent the number of coefficients required to adequately describe the isotherms ( $m$  and  $n$  were gradually increased till the contribution of extra added  $a$  and  $b$  coefficients was deemed to be statistically insignificant towards the overall fit. And the average value of the squared deviations from the experimental values was minimized). The values of the virial coefficients  $a_0$  through  $a_m$  were then used to calculate the isosteric heat of absorption using the following expression:

$$Q_{st} = -R \sum_{i=0}^m a_i N_i \quad (4)$$

$Q_{st}$  is the coverage-dependent isosteric heat of adsorption and  $R$  is the universal gas

constant. The heat enthalpy of C<sub>2</sub>H<sub>6</sub> and C<sub>2</sub>H<sub>4</sub> sorption for ZJU-HOF-60a in this manuscript are determined by using the sorption data measured in the pressure range from 0–1 bar (at 273 K, 296 K, and 313 K).

### 3. IAST calculations

The selectivity of preferential adsorption of component 1 (C<sub>2</sub>H<sub>6</sub>) over component 2 (C<sub>2</sub>H<sub>4</sub>) can be defined as the following equation:

$$S_{ads} = \frac{q_1/q_2}{p_1/p_2} \quad (5)$$

In equation (5),  $q_1$  and  $q_2$  are the molar loadings in the adsorbed phase in equilibrium with the bulk gas phase with partial pressures  $p_1$ , and  $p_2$ . The component loadings and adsorption selectivity  $S_{ads}$  for 50/50 C<sub>2</sub>H<sub>6</sub> (1)/C<sub>2</sub>H<sub>4</sub> (2) and 10/90 C<sub>2</sub>H<sub>6</sub> (1)/C<sub>2</sub>H<sub>4</sub> (2) mixtures in ZJU-HOF-60a at 296 K were determined using IAST.

### 4. Density functional theory (DFT) calculations

The structure of ZJU-HOF-60a was optimized in the Dmol<sup>3</sup> module, using the generalized gradient approximation (GGA) with the Perdew-Burke-Ernzerhof (PBE) functional and the double numerical plus d-functions (DNP) basis set.<sup>1-3</sup> The energy, force, and displacement convergence criteria were set as  $1 \times 10^{-5}$  Ha,  $2 \times 10^{-3}$  Ha/Å and  $5 \times 10^{-3}$  Å, respectively. Single point energy calculations with the same parameters using Dmol<sup>3</sup> were performed on the optimized ZJU-HOF-60a structure. The electron density data obtained from these calculations were used to construct the  $0.15 \text{ e}^- \text{ \AA}^{-3}$  electron density isosurfaces of the framework, with a grid interval of 0.1 Å. The calculated electrostatic potential for ZJU-HOF-60a was then mapped onto their electron density isosurfaces.

### 5. Quantification of the diffusion rate

The diffusion rate was measured on a BELSORP-max II (BEL Japan, Inc.) automated volumetric sorption analyzer and was fitted automatically with BEL-Master software according

to the Crank theory described in the reported literatures.<sup>4-6</sup>

Adsorption rate equation in consideration of in-particle diffusion (assuming spherical particle):

$$\frac{\partial q}{\partial t} = D_s \left( \frac{\partial^2 q}{\partial r^2} + \frac{2}{r} \times \frac{\partial q}{\partial r} \right) \quad (6)$$

Boundary condition: When  $r = R$ ,  $q = q_{0n}$

$$\text{Linear equilibrium equation: } q^* = H \times P \quad (7)$$

Here, H is equilibrium constant in  $\text{m}^3 \text{g}^{-1}$ , p is pressure in Pa.

Equation (8) for batch adsorbing operation is used.

$$W(q - q_{0n}) = V(p_{0n} - p) \quad (8)$$

W is mass of adsorbent (g), V is fluid volume ( $\text{m}^3$ ).

By solving simultaneous equations of the above (6), (7), and (8), the following solution is obtained:

$$\frac{p}{p_{0n}} = 1 - \left( \frac{1}{\alpha + 1} \right) \left[ 1 - \sum_{n=1}^{\infty} \frac{6\alpha(\alpha + 1) \exp(-q_n^2 \tau_s)}{9 + 9\alpha + q_n^2 \alpha^2} \right] \quad (9)$$

Equation (9) is called ‘‘Crank equation’’.

$$\frac{p - p_{en}}{p_{0n} - p_{en}} = 1 - \left( \frac{p_{0n} - p_{en-1}}{p_{0n} - p_{en}} \right) \left( \frac{1}{\alpha + 1} \right) \left[ 1 - \sum_{n=1}^{\infty} \frac{6\alpha(\alpha + 1) \exp(-q_n^2 \tau_s)}{9 + 9\alpha + q_n^2 \alpha^2} \right] \quad (10)$$

With gas state Equation ( $p = cRT$ ), Equation (10) is expressed as the following equation, from which solution of analysis considering pore diffusion can be obtained.

$$\frac{C - C_{en}}{C_{0n} - C_{en}} = 1 - \left( \frac{C_{0n} - c_{en-1}}{C_{0n} - C_{en}} \right) \left( \frac{1}{\alpha + 1} \right) \left[ 1 - \sum_{n=1}^{\infty} \frac{6\alpha(\alpha + 1) \exp(-q_n^2 \tau_s)}{9 + 9\alpha + q_n^2 \alpha^2} \right] \quad (11)$$

Wherein,  $\tau_s = \frac{D_s t}{R^2}$ ,  $\alpha = \frac{V}{W \times H}$

For the adsorption rate analysis program, equation (11) is used.

## 6. Grand canonical Monte Carlo simulations

To obtain the reasonable binding sites of gas molecules in ZJU-HOF-60a for subsequent modeling, grand canonical Monte Carlo (GCMC) simulations were performed. The crystal structures of ZJU-HOF-60a were chosen for related simulations without further geometry optimization. The framework and the individual C<sub>2</sub>H<sub>6</sub> and C<sub>2</sub>H<sub>4</sub> molecules were considered to be rigid during the simulation. Partial charges for atoms of guest-free ZJU-HOF-60a were derived from QEq method and QEq\_neutral1.0 parameter. The simulations were carried out at 298 K, adopting the locate task, Metropolis method in the Sorption module and the universal force field (UFF). The partial charges on the atoms of C<sub>2</sub>H<sub>6</sub> (C: -0.455e; H: 0.152e, where e = 1.6022×10<sup>-19</sup> C is the elementary charge) and C<sub>2</sub>H<sub>4</sub> (C: -0.293e; H: 0.147e) were also derived from QEq method. The interaction energy between hydrocarbon molecules and framework was computed through the Coulomb and Lennard-Jones 6-12 Lennard-Jones (LJ) potentials. The cutoff radius was chosen as 15.5 Å for the LJ potential and the long-range electrostatic interactions were handled using the Ewald & Group summation method. The loading steps and the equilibration steps were 1 × 10<sup>5</sup>, the production steps were 1 × 10<sup>6</sup>.

## 7. Gas equilibrium adsorption capacity

The complete breakthrough of C<sub>2</sub>H<sub>6</sub> was indicated by the downstream gas composition reaching that of the feed gas. Based on the mass balance, the gas adsorption capacities can be determined as follows:

$$q_i = \frac{C_i V}{22.4 \times m} \times \int_0^t \left(1 - \frac{F}{F_0}\right) dt \quad (12)$$

where  $q_i$  is the equilibrium adsorption capacity of gas  $i$  (mmol g<sup>-1</sup>),  $C_i$  is the feed gas concentration,  $V$  is the volumetric feed flow rate (cm<sup>3</sup> min<sup>-1</sup>),  $t$  is the adsorption time (min),  $F_0$  and  $F$  are the inlet and outlet gas molar flow rates, respectively, and  $m$  is the mass of the adsorbent (g).

## Notation

|                  |                                                                        |
|------------------|------------------------------------------------------------------------|
| $q$              | component molar loading of species $i$ , mol kg <sup>-1</sup>          |
| $q_{\text{sat}}$ | saturation loading, mol kg <sup>-1</sup>                               |
| $b$              | Langmuir-Freundlich constant, Pa <sup>-<math>\nu_{iA}</math></sup>     |
| $T$              | absolute temperature, K                                                |
| $a_i$            | Virial coefficients, dimensionless                                     |
| $b_j$            | Virial coefficients, dimensionless                                     |
| $Q_{\text{st}}$  | isosteric heat of adsorption, kJ mol <sup>-1</sup>                     |
| $p_i$            | total system pressure, Pa                                              |
| $c_i$            | molar concentration of species $i$ in gas mixture, mol m <sup>-3</sup> |
| $D_s$            | surface diffusion coefficient, cm <sup>2</sup> s <sup>-1</sup>         |
| $H$              | equilibrium constant, cm <sup>3</sup> g <sup>-1</sup>                  |
| $P_0$            | initial pressure, Pa                                                   |
| $P_e$            | equilibrium pressure, Pa                                               |
| $R$              | radius of particle, cm                                                 |
| $t$              | time, s                                                                |
| $V$              | Gas phase volume, cm <sup>3</sup>                                      |
| $W$              | adsorbent amount, g                                                    |

## Greek letters

|       |                                    |
|-------|------------------------------------|
| $\nu$ | Freundlich exponent, dimensionless |
|-------|------------------------------------|

## Supplementary Tables

**Table S1.** Physicochemical properties of C<sub>2</sub>H<sub>6</sub> and C<sub>2</sub>H<sub>4</sub> molecules.

|                               | Kinetic<br>Diameter (Å) | Molecular<br>dimensions (Å)      | Boiling<br>point (K) | Polarizability<br>( $\times 10^{-25}$ cm <sup>3</sup> ) | Quadrupole moment<br>( $\times 10^{-26}$ esu cm <sup>2</sup> ) |
|-------------------------------|-------------------------|----------------------------------|----------------------|---------------------------------------------------------|----------------------------------------------------------------|
| C <sub>2</sub> H <sub>4</sub> | 4.16                    | 3.28 $\times$ 4.18 $\times$ 4.84 | 169.5                | 42.52                                                   | 1.50                                                           |
| C <sub>2</sub> H <sub>6</sub> | 4.44                    | 3.81 $\times$ 4.82 $\times$ 4.08 | 184.6                | 44.70                                                   | 0.65                                                           |



**Table S2.** Crystallographic data and structure refinement results of ZJU-HOF-60 and ZJU-HOF-60a.

|                                         | ZJU-HOF-60                                     | ZJU-HOF-60a                                    |
|-----------------------------------------|------------------------------------------------|------------------------------------------------|
| Formula                                 | C <sub>18</sub> H <sub>10</sub> O <sub>8</sub> | C <sub>18</sub> H <sub>10</sub> O <sub>8</sub> |
| Formula weight                          | 354.26                                         | 354.26                                         |
| Crystal system                          | triclinic                                      | monoclinic                                     |
| Space group                             | $P\bar{1}$                                     | $I2/m$                                         |
| $a$ (Å)                                 | 6.824(2)                                       | 3.647(3)                                       |
| $b$ (Å)                                 | 14.235(4)                                      | 16.438(14)                                     |
| $c$ (Å)                                 | 14.278(3)                                      | 20.954(2)                                      |
| $\alpha$ (°)                            | 70.00(3)                                       | 90                                             |
| $\beta$ (°)                             | 88.62(2)                                       | 91.58(6)                                       |
| $\gamma$ (°)                            | 76.31(2)                                       | 90                                             |
| Cell volume (Å <sup>3</sup> )           | 1263.83(6)                                     | 1255.47(19)                                    |
| $Z$                                     | 2                                              | 2                                              |
| $D_{\text{calc}}$ (g·cm <sup>-3</sup> ) | 0.930864                                       | 0.937063                                       |
| $\mu$ (mm <sup>-1</sup> )               | 0.642                                          | 0.646                                          |
| $F(000)$                                | 364                                            | 364                                            |
| GOF                                     | 0.961                                          | 1.043                                          |
| $R_{\text{int}}$                        | 0.1904                                         | 0.0560                                         |
| $R_I, wR_2$ [ $I \geq 2\sigma(I)$ ]     | 0.0768, 0.1997                                 | 0.0697, 0.1915                                 |
| $R_I, wR_2$ [all data]                  | 0.1400, 0.2451                                 | 0.0734, 0.1957                                 |
| Largest diff. peak and hole             | 0.329 and -0.324                               | 0.482 and -0.248                               |

CCDC number

2358377

2358378

---

**Table S3.** Dual-site Langmuir-Freundlich parameter fits for C<sub>2</sub>H<sub>6</sub> and C<sub>2</sub>H<sub>4</sub> in ZJU-HOF-60a. The fits are based on experimental isotherm data at 296 K.

|                               | Site A                              |                                                |                          | Site B                              |                                                |                          |
|-------------------------------|-------------------------------------|------------------------------------------------|--------------------------|-------------------------------------|------------------------------------------------|--------------------------|
|                               | $q_{A,sat}$<br>mol kg <sup>-1</sup> | $b_{A0}$<br>kPa <sup>-<math>\nu_A</math></sup> | $\nu_A$<br>dimensionless | $q_{B,sat}$<br>mol kg <sup>-1</sup> | $b_{B0}$<br>kPa <sup>-<math>\nu_B</math></sup> | $\nu_B$<br>dimensionless |
| C <sub>2</sub> H <sub>6</sub> | 2.73416                             | 0.01517                                        | 0.93680                  | 5.26969                             | $4.5747 \times 10^{-4}$                        | 1.62180                  |
| C <sub>2</sub> H <sub>4</sub> | 3.30884                             | 0.00641                                        | 1.05327                  | 2.13327                             | $3.0779 \times 10^{-5}$                        | 2.19194                  |

**Table S4.** Summary of separation metrics of C<sub>2</sub>H<sub>6</sub>-selective HOF materials reported in the literature at 1 bar and room temperature (RT).

|                      | C <sub>2</sub> H <sub>6</sub> uptake <sup>a</sup><br>(mmol g <sup>-1</sup> ) | C <sub>2</sub> H <sub>6</sub> /C <sub>2</sub> H <sub>4</sub><br>uptake ratio <sup>b</sup> | IAST<br>selectivity <sup>c</sup> | Productivity <sup>d</sup><br>(L kg <sup>-1</sup> ) | Ref.             |
|----------------------|------------------------------------------------------------------------------|-------------------------------------------------------------------------------------------|----------------------------------|----------------------------------------------------|------------------|
| HOF-BTB <sup>e</sup> | 3.09                                                                         | 1.24                                                                                      | 1.4                              | –                                                  | 7                |
| HOF-76a              | 2.95                                                                         | 1.77                                                                                      | 2.0                              | 7.2                                                | 8                |
| ZJU-HOF-1            | 4.87                                                                         | 1.22                                                                                      | 2.25                             | 21.9                                               | 9                |
| ZJU-HOF-10(sc)       | 2.19                                                                         | 1.17                                                                                      | 1.9                              | 6.9                                                | 10               |
| HOF-NBDA             | 3.98                                                                         | 1.36                                                                                      | 1.75                             | –                                                  | 1                |
| MTHOF-1              | 1.27                                                                         | 1.09                                                                                      | 2.15                             | –                                                  | 11               |
| HIAM-102             | 2.15                                                                         | 1.09                                                                                      | 1.9                              | 5.3                                                | 12               |
| HIAM-103             | 1.56                                                                         | 1.04                                                                                      | 1.6                              | 4.4                                                | 13               |
| <b>ZJU-HOF-60a</b>   | <b>3.79</b>                                                                  | <b>1.58</b>                                                                               | <b>1.8</b>                       | <b>7.8</b>                                         | <b>This work</b> |

<sup>a</sup> C<sub>2</sub>H<sub>6</sub> uptake at 1 bar and RT.

<sup>b</sup> C<sub>2</sub>H<sub>6</sub>/C<sub>2</sub>H<sub>4</sub> uptake ratio at 1 bar and RT.

<sup>c</sup> IAST selectivity for 50/50 C<sub>2</sub>H<sub>6</sub>/C<sub>2</sub>H<sub>4</sub> gas mixtures.

<sup>d</sup> The pure C<sub>2</sub>H<sub>4</sub> productivity calculated from breakthrough experiments at 1 bar and RT on 50/50 gas mixtures.

<sup>e</sup> The reported literature only described the C<sub>2</sub>H<sub>4</sub> and C<sub>2</sub>H<sub>6</sub> adsorption isotherms, so the selectivity was evaluated based on these isotherms.

## Supplementary Figures

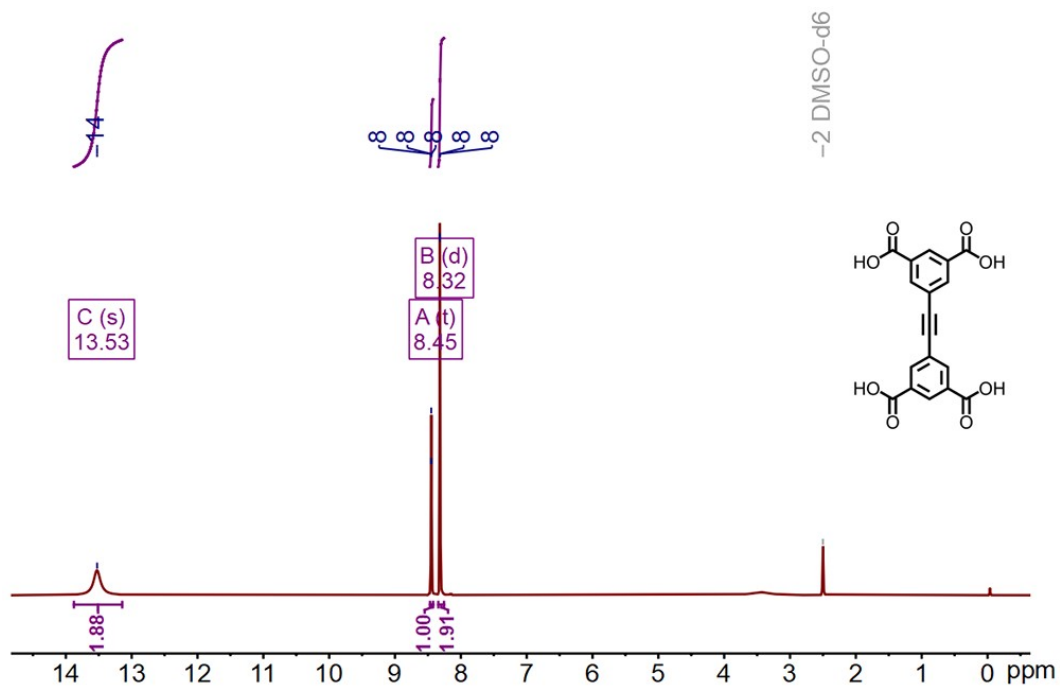

**Figure S1.**  $^1\text{H}$  NMR spectrum of  $\text{H}_4\text{EBDC}$  in  $\text{DMSO-}d_6$ .

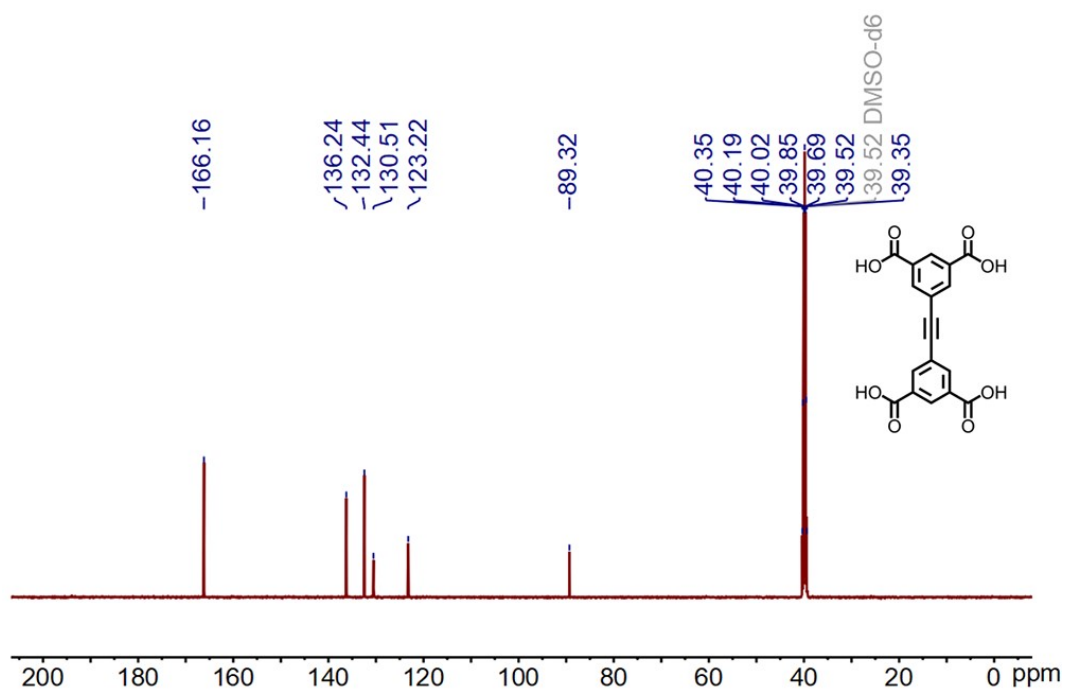

**Figure S2.**  $^{13}\text{C}$  NMR spectrum of  $\text{H}_4\text{EBDC}$  in  $\text{DMSO-}d_6$ .

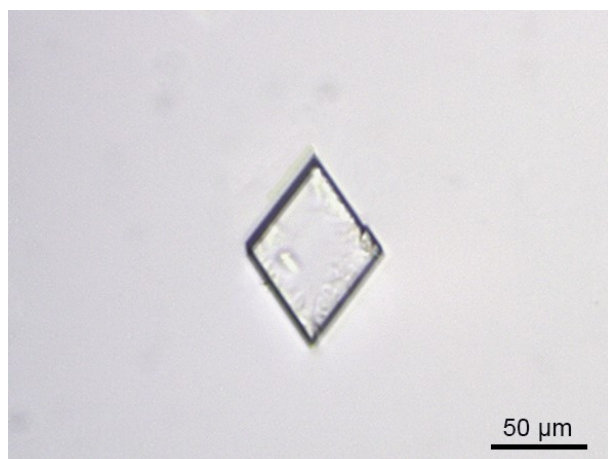

**Figure S3.** The optical photos of the as-synthesized crystal of ZJU-HOF-60.

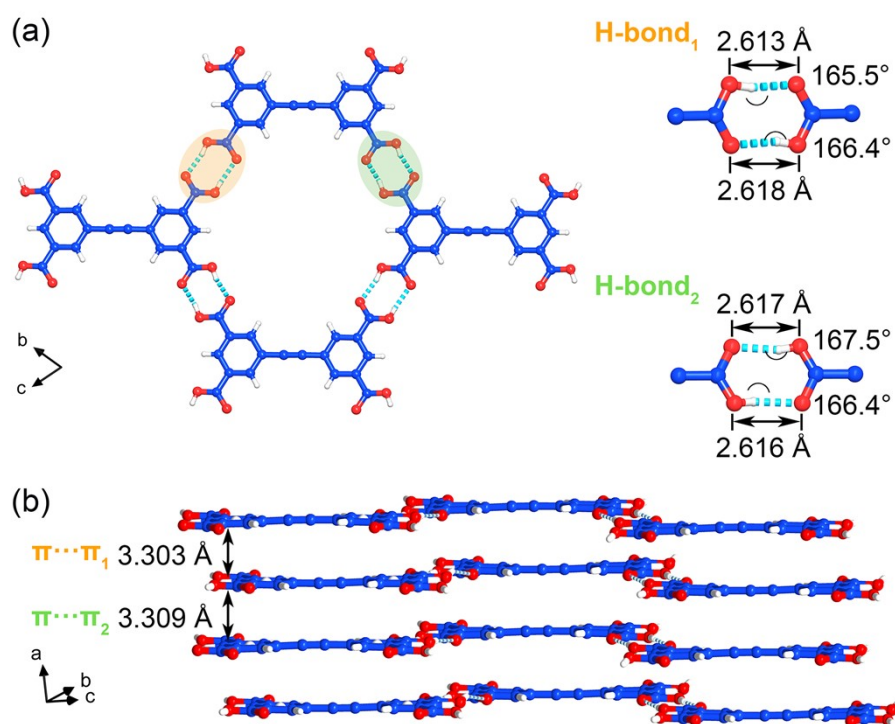

**Figure S4.** Crystal structure description of ZJU-HOF-60 (C, blue; O, red; H, white). (a) Illustration of the hydrogen bond connection in ZJU-HOF-60. The H<sub>4</sub>EBDC molecule is connected to the surrounding molecules by two different sets of carboxyl···carboxyl dimer linkage with the O–H···O distance from 2.613 to 2.618 Å, and the angles varying from 165.5° to 167.5°. (b) The layered frameworks of ZJU-HOF-60 are arranged in a staggered AA stacking pattern, with the  $\pi$ ··· $\pi$  stacking interactions (average distance of 3.306 Å) from the phenyl rings and the C $\equiv$ C.

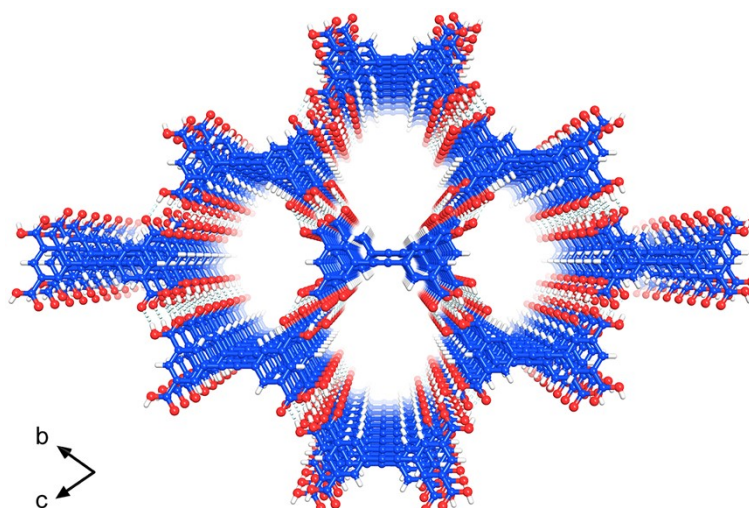

**Figure S5.** The framework structure of ZJU-HOF-60. Color code: C (blue), O (red), and H (white).

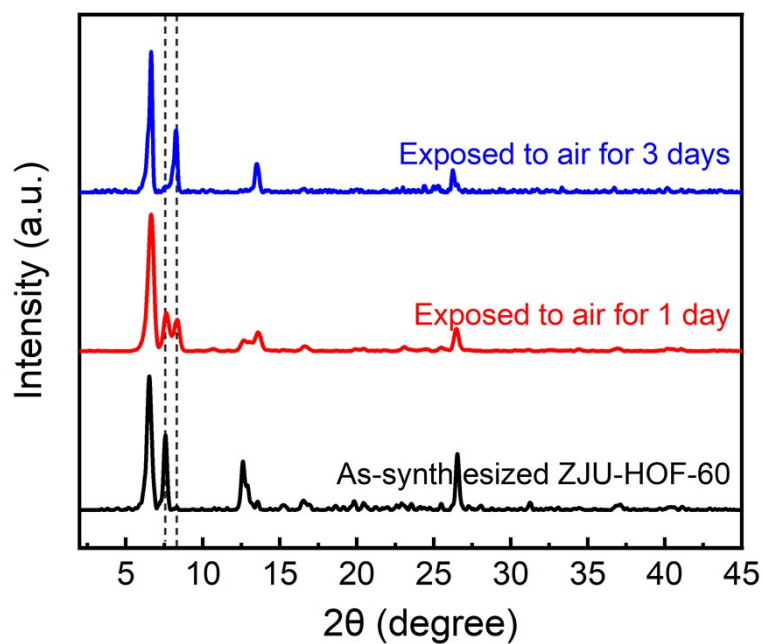

**Figure S6.** PXRD patterns of as-synthesized samples ZJU-HOF-60 exposed to air for 3 days, indicating that ZJU-HOF-60 can transform into the activated ZJU-HOF-60a after the guest solvents evaporate away.

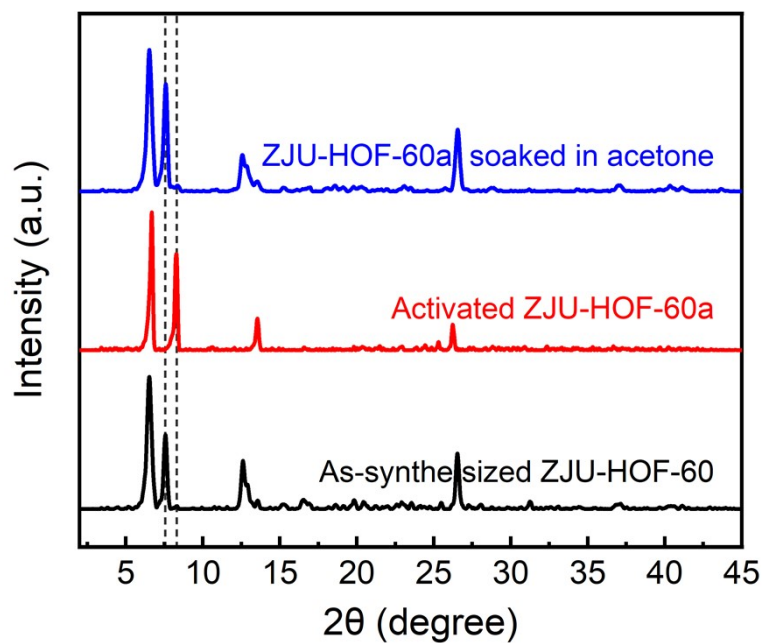

**Figure S7.** PXRD patterns for activated ZJU-HOF-60a after soaking in acetone, indicate that the framework of ZJU-HOF-60a can reversibly transform into ZJU-HOF-60.

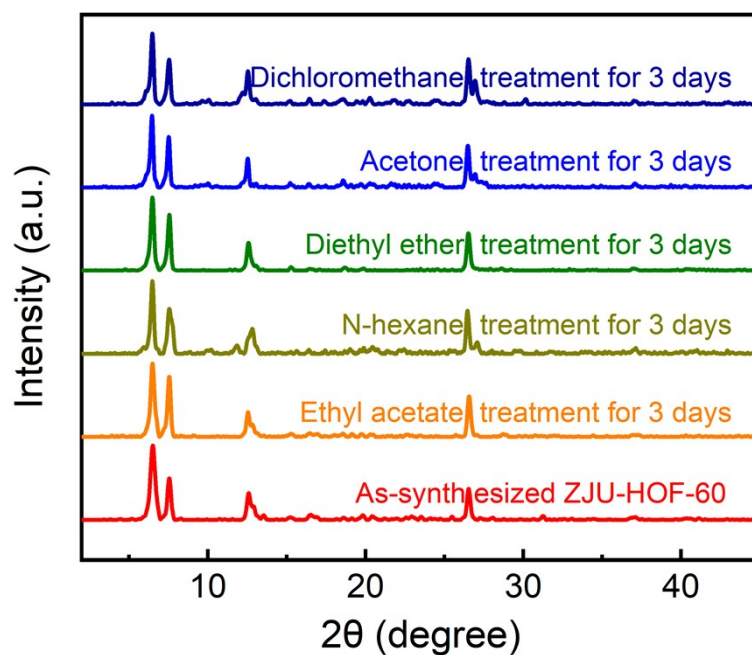

**Figure S8.** PXRD patterns for as-synthesized ZJU-HOF-60 after soaking in various organic solvents.



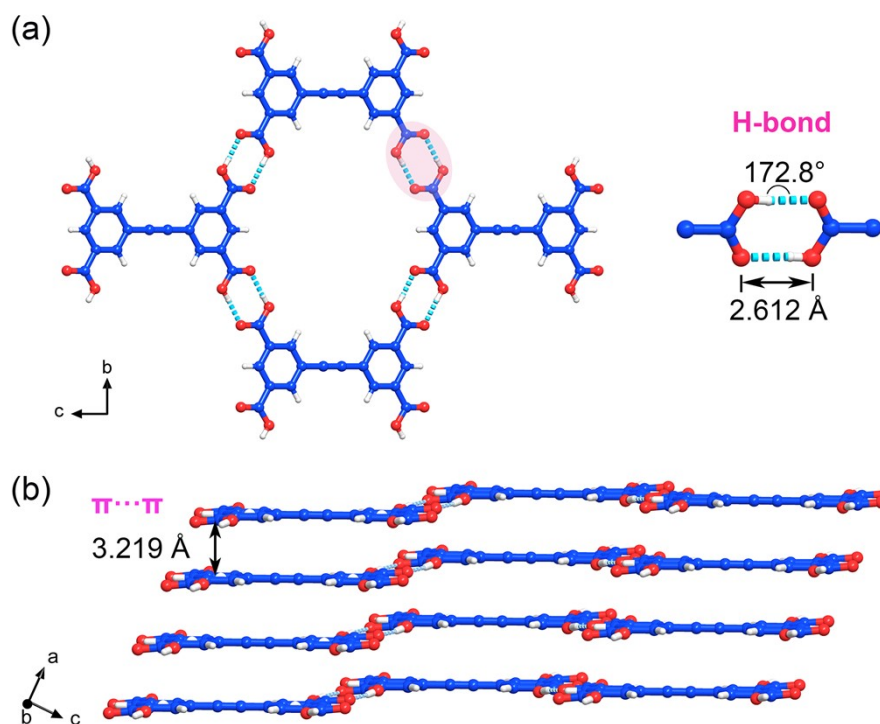

**Figure S9.** Crystal structure description of ZJU-HOF-60a (C, blue; O, red; H, white). (a) Illustration of the hydrogen bond connection in ZJU-HOF-60a. The H<sub>4</sub>EBDC molecules are arranged by the carboxyl dimer, and the O–H···O distance and angle are 2.612 Å and 172.8°, respectively. (b) The 2D layers of ZJU-HOF-60a are stacked in an eclipsed AA stacking pattern with  $\pi\cdots\pi$  interactions (distance of 3.219 Å).

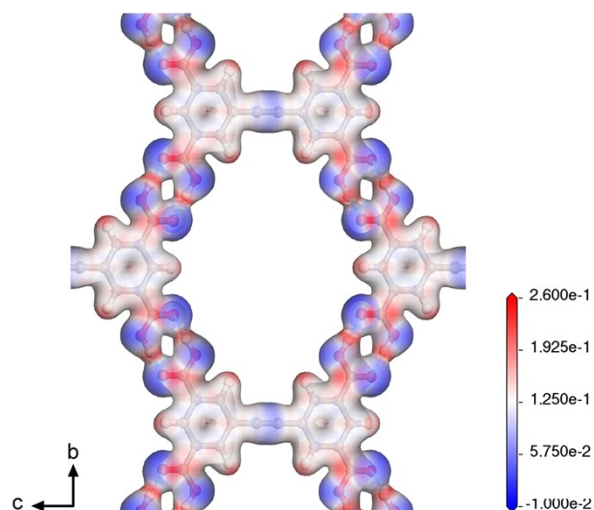

**Figure S10.** The ESP of pore channels for ZJU-HOF-60a. (viewed along the *a*-axis). The gradation on the scale bar is in Hartree/e.

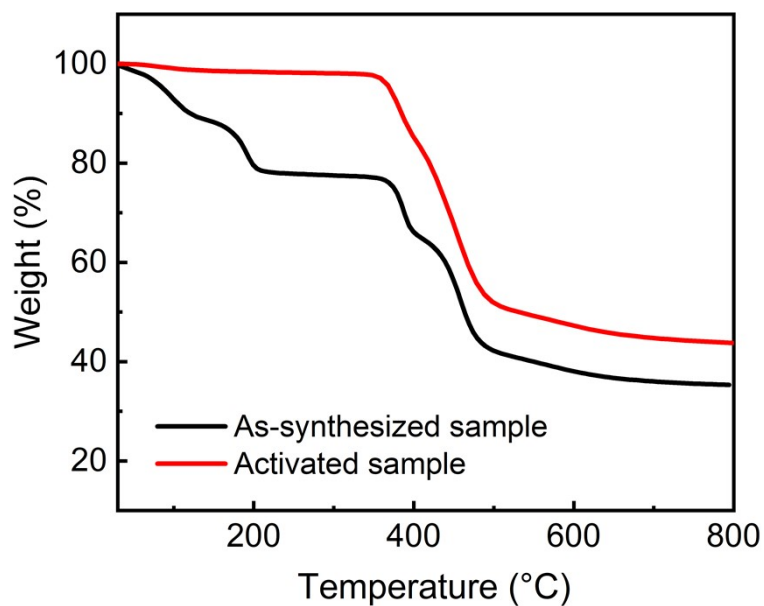

**Figure S11.** TGA curve of the as-synthesized sample ZJU-HOF-60 (black) and the activated ZJU-HOF-60a (red).

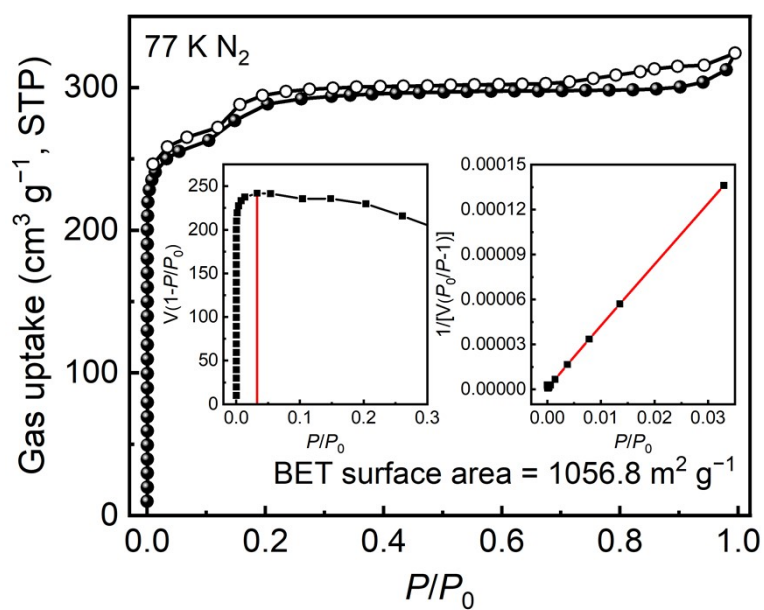

**Figure S12.** Nitrogen adsorption isotherm at 77 K with consistency and BET plots for the activated ZJU-HOF-60a sample.

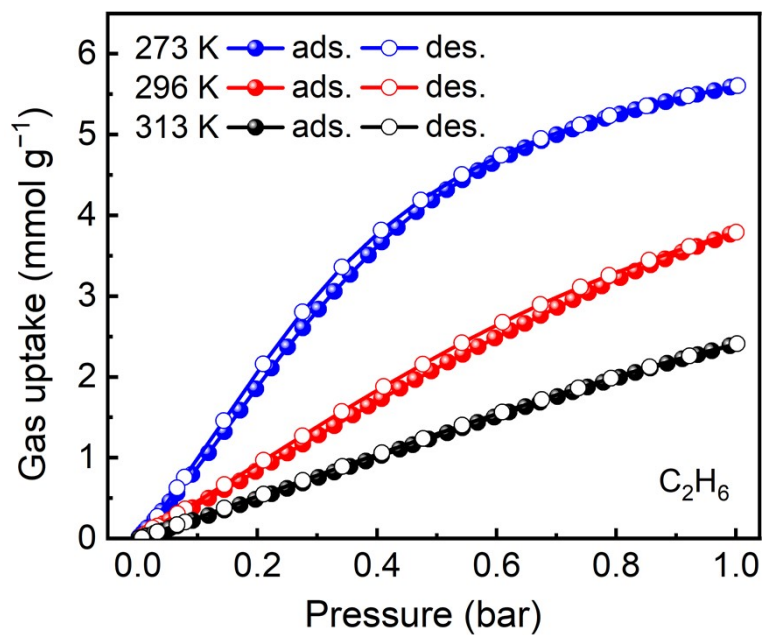

**Figure S13.** Adsorption isotherms of  $C_2H_6$  for ZJU-HOF-60a at 273 (blue), 296 K (red), and 313 K (black) up to 1 bar. Filled/empty symbols represent adsorption/desorption.

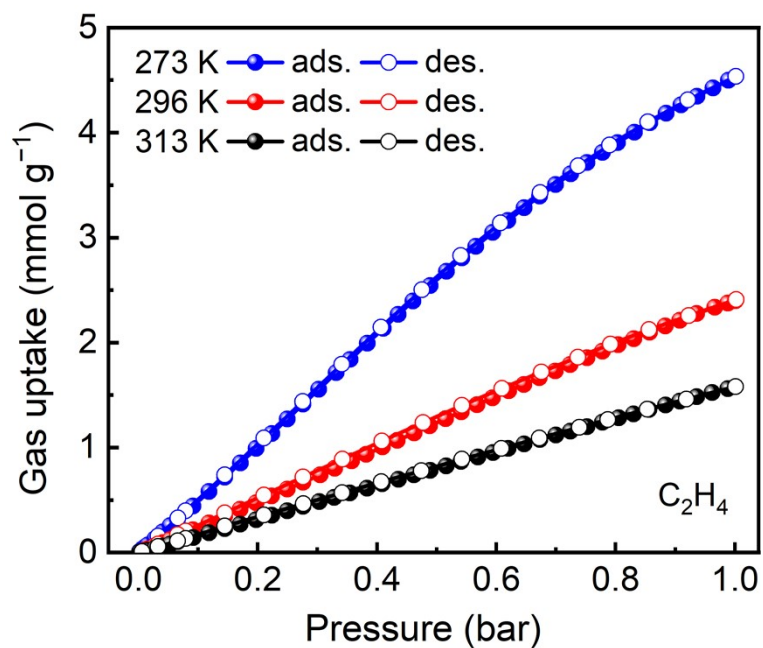

**Figure S14.** Adsorption isotherms of  $C_2H_4$  for ZJU-HOF-60a at 273 (blue), 296 K (red), and 313 K (black) up to 1 bar. Filled/empty symbols represent adsorption/desorption.

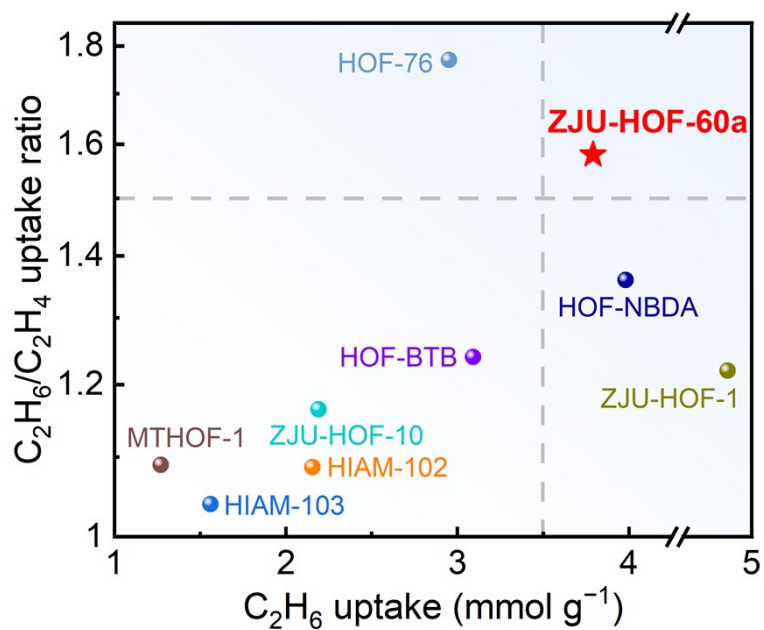

**Figure S15.** Comparison of  $C_2H_6$  uptake capacity and  $C_2H_6/C_2H_4$  uptake ratio at 1 bar and room temperature for ZJU-HOF-60a and other reported  $C_2H_6$ -selective HOF materials.

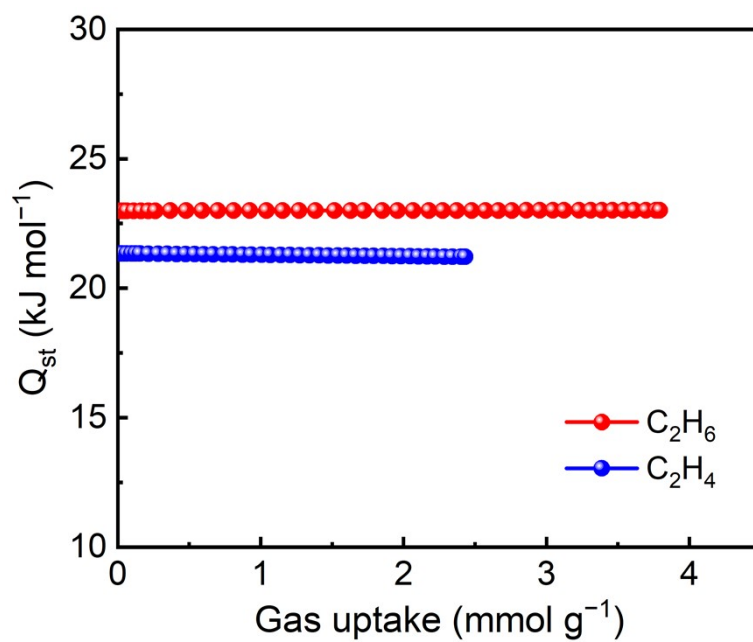

**Figure S16.** Adsorption heat of the  $C_2H_6$  (red) and  $C_2H_4$  (blue) for ZJU-HOF-60a.

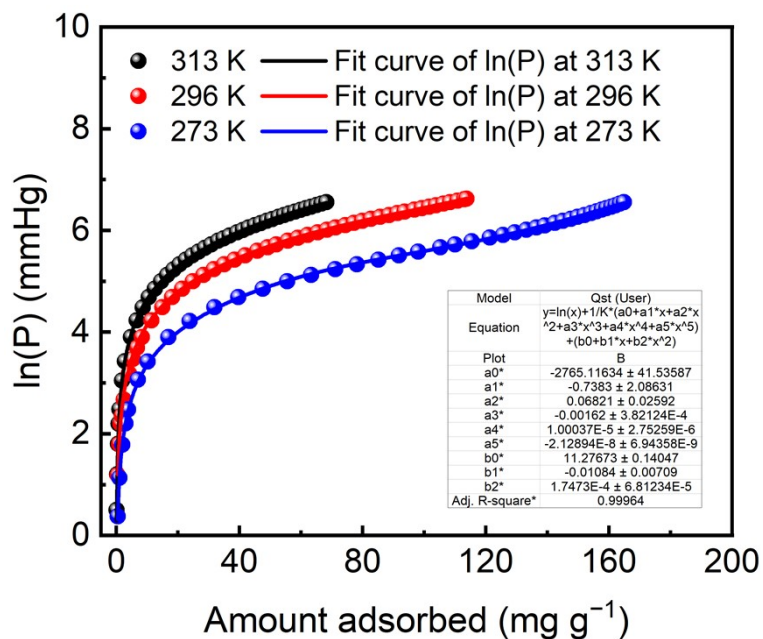

Figure S17. Virial fitting of the  $C_2H_6$  adsorption isotherms for ZJU-HOF-60a.

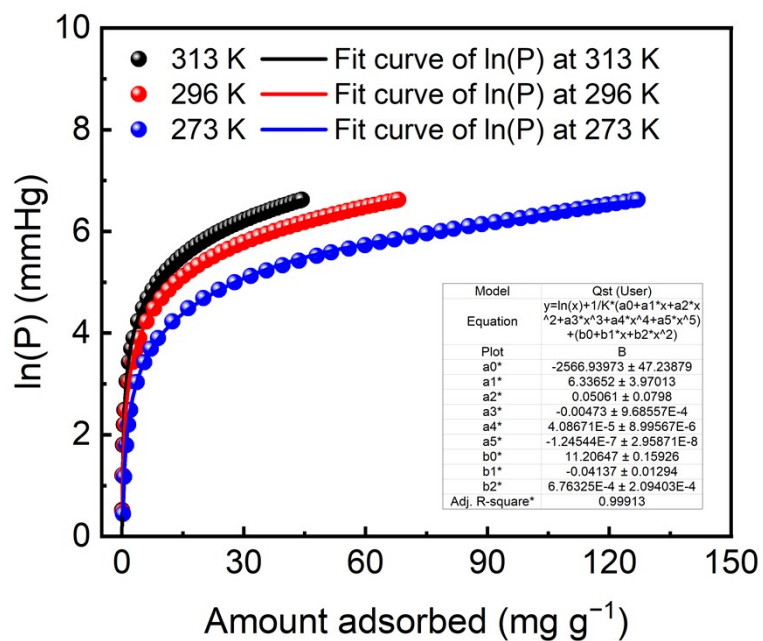

Figure S18. Virial fitting of the  $C_2H_4$  adsorption isotherms for ZJU-HOF-60a.

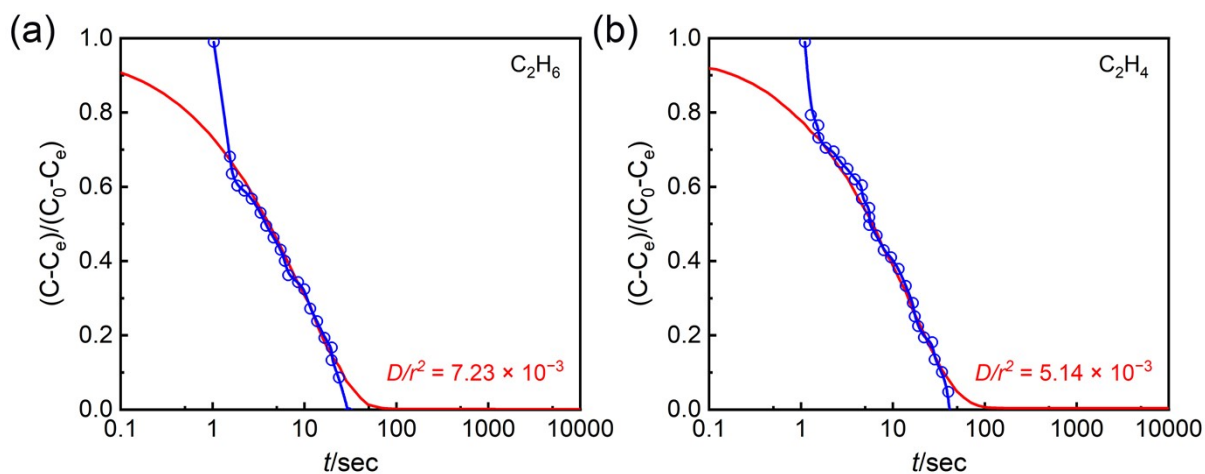

**Figure S19.** The calculated (a)  $C_2H_6$  and (b)  $C_2H_4$  diffusion rate constants on ZJU-HOF-60, fitted automatically with BEL-Master software according to the Crank theory.  $C$ , concentration;  $C_0$ , initial concentration;  $C_e$ , concentration at equilibrium.

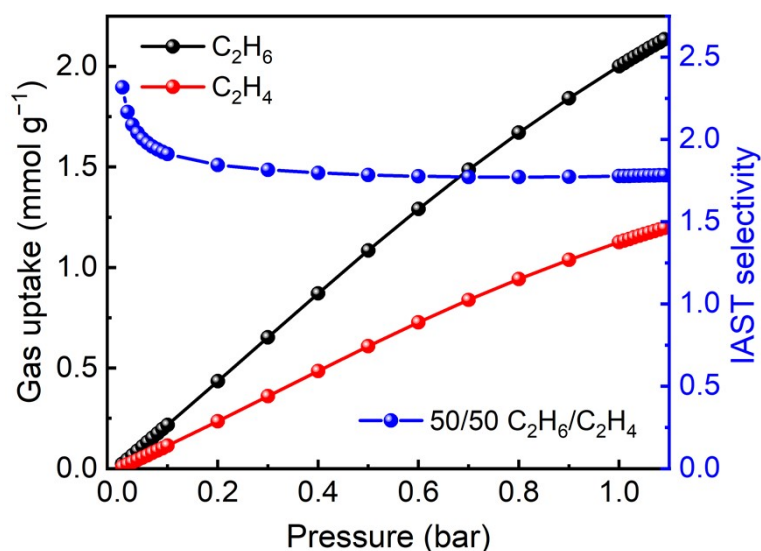

**Figure S20.** Predicted mixture adsorption isotherms (left Y-axis) and selectivity (right Y-axis) of ZJU-HOF-60a predicted by the IAST method for a 50/50 (v/v)  $C_2H_6/C_2H_4$  mixture at 296 K.

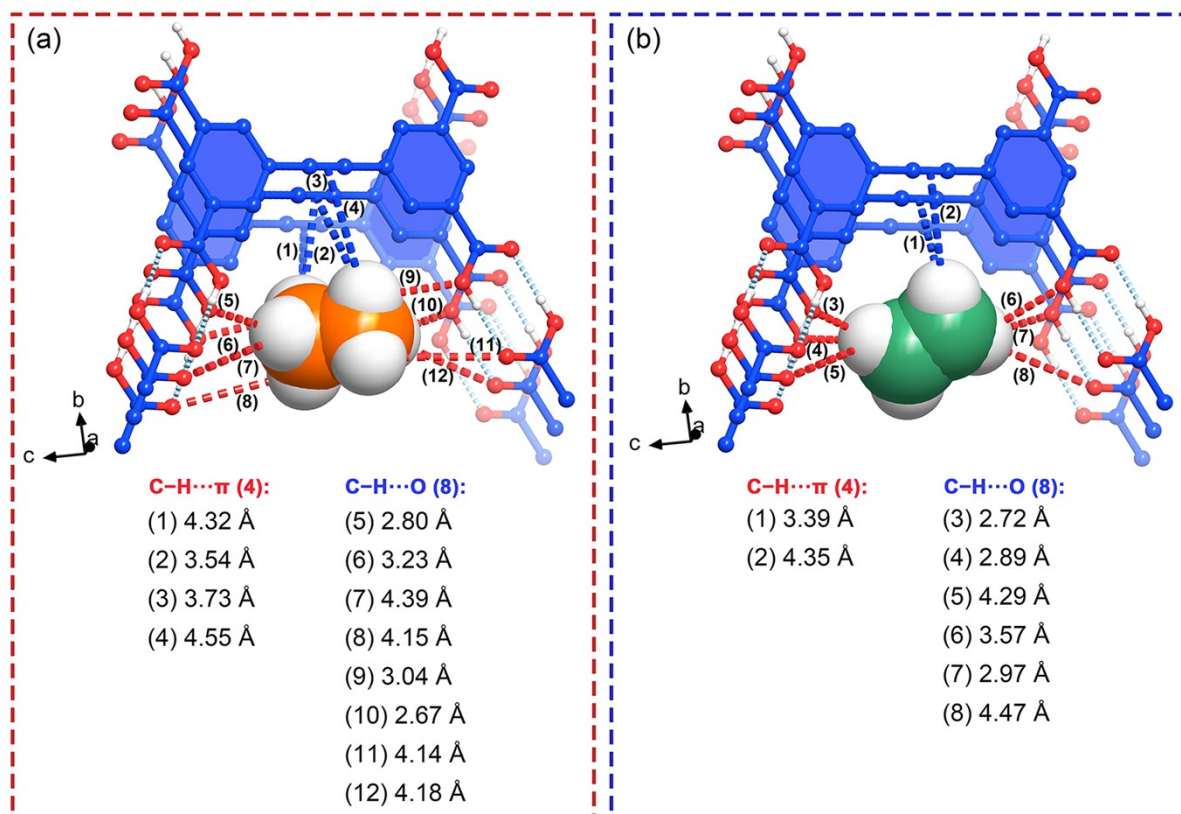

**Figure S21.** Comparison of the preferential  $C_2H_6$  and  $C_2H_4$  adsorption sites and the close van der Waals contacts within the rhombic pores in ZJU-HOF-60a (C, blue; O, red; H, white) observed by GCMC simulations, highlighting the C-H... $\pi$  interactions (blue dashed lines) and C-H...O (red dashed lines) interactions. The hydrogen atoms in the benzene ring are omitted for clarity.

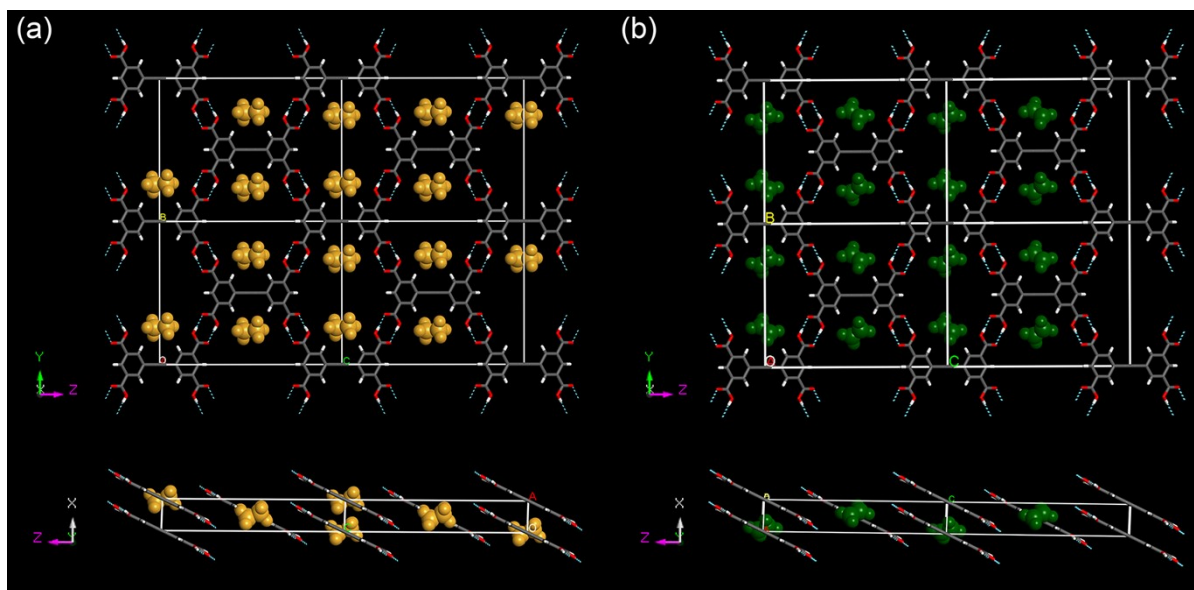

**Figure S22.** A local structure of ZJU-HOF-60a showing all the adsorbed gas molecules for (a)  $C_2H_6$  and (b)  $C_2H_4$ . There exist four gas molecules within each unit cell if all the binding sites are fully occupied.

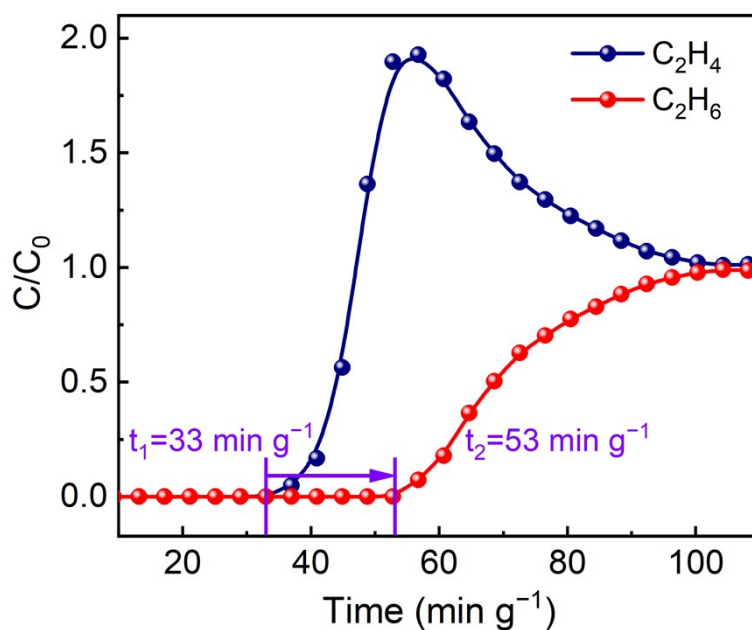

**Figure S23.** The calculation of the  $C_2H_4$  productivity during the breakthrough process of 50/50  $C_2H_6/C_2H_4$  mixtures in ZJU-HOF-60a. The flow rate of  $C_2H_4$  is 1.25 mL/min and the sample weight is 0.758 g. The  $C_2H_4$  productivity is defined by the breakthrough amount of  $C_2H_4$ , which is calculated by integration of the breakthrough curves  $f(t)$  during a period from  $t_1$  (33 min g<sup>-1</sup>) to  $t_2$  (53 min g<sup>-1</sup>) where the  $C_2H_4$  purity is higher than or equal to the threshold value of 99.95%. The  $C_2H_4$  productivity is calculated to be 7.8 L kg<sup>-1</sup> based on equation (12).



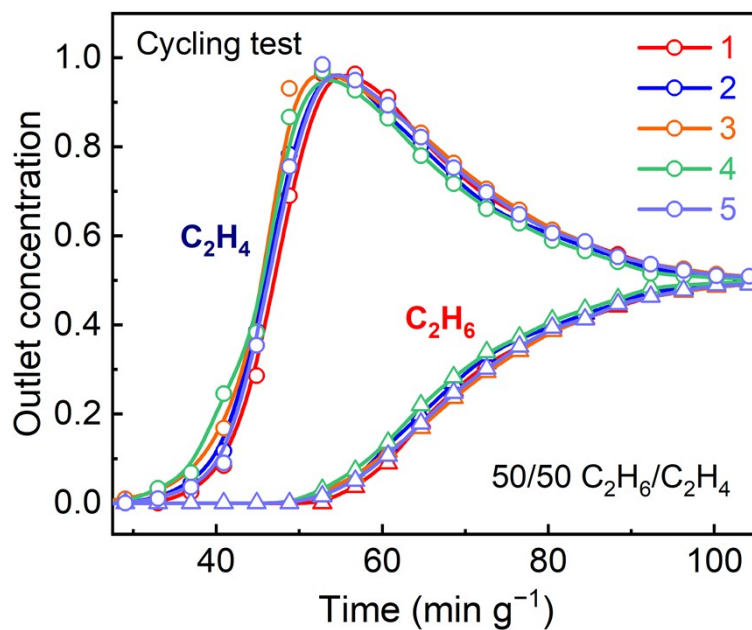

**Figure S24.** Cyclic breakthrough experiments for C<sub>2</sub>H<sub>6</sub>/C<sub>2</sub>H<sub>4</sub> (50/50, v/v) separation of ZJU-HOF-60a at room temperature.

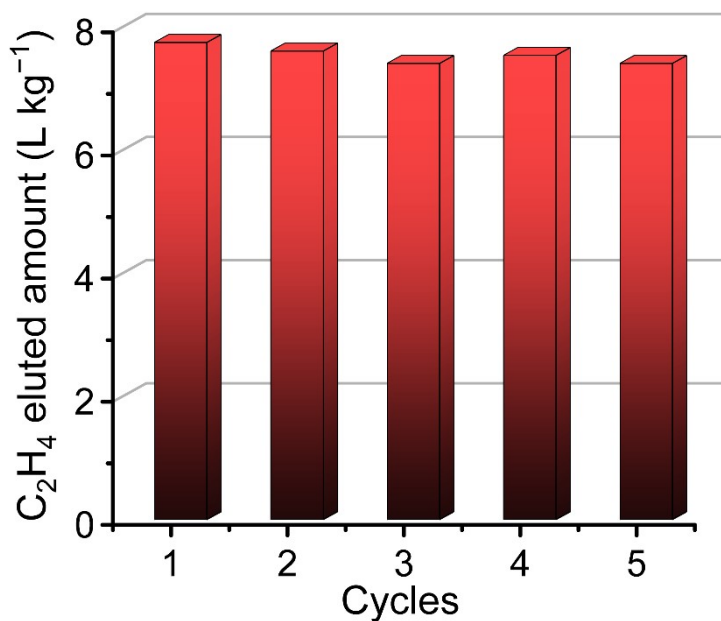

**Figure S25.** The high-purity C<sub>2</sub>H<sub>4</sub> productivity of cyclic breakthrough experiments for C<sub>2</sub>H<sub>6</sub>/C<sub>2</sub>H<sub>4</sub> (50/50) mixture on ZJU-HOF-60a at room temperature, indicating that there was no obvious loss in the elution amount of high-purity C<sub>2</sub>H<sub>4</sub> within five continuous cycles.

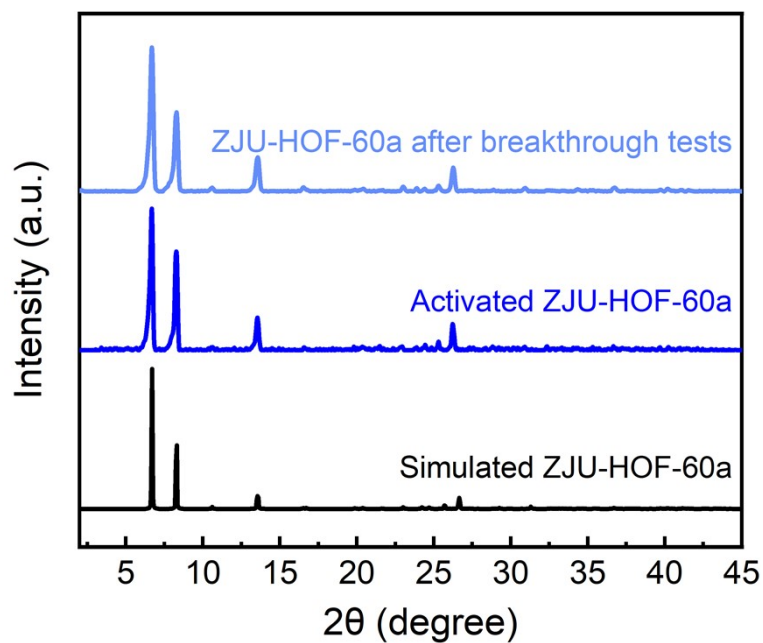

**Figure S26.** PXRD patterns for ZJU-HOF-60a after the test, indicate that ZJU-HOF-60a maintains structural integrity after multiple adsorption tests and breakthrough experiments.

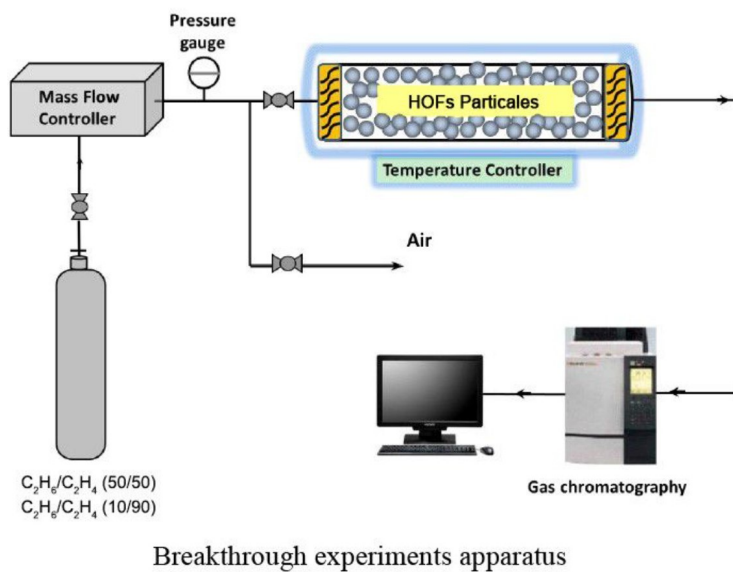

**Figure S27.** Schematic illustration of the apparatus for the breakthrough experiments.

## Supplementary References

- [1] Y. Zhou, C. Chen, R. Krishna, Z. Ji, D. Yuan and M. Wu, *Angew. Chem. Int. Ed.*, 2023, **62**, e202305041.
- [2] H.-M. Wen, C. Yu, M. Liu, C. Lin, B. Zhao, H. Wu, W. Zhou, B. Chen and J. Hu, *Angew. Chem. Int. Ed.*, 2023, **62**, e202309108.
- [3] Y. Xie, H. Cui, H. Wu, R.-B. Lin, W. Zhou and B. Chen, *Angew. Chem. Int. Ed.*, 2021, **60**, 9604–9609.
- [4] H. Zeng, M. Xie, T. Wang, R.-J. Wei, X.-J. Xie, Y. Zhao, W. Lu and D. Li, *Nature*, 2021, **595**, 542–548.
- [5] L. Li, L. Guo, D. H. Olson, S. Xian, Z. Zhang, Q. Yang, K. Wu, Y. Yang, Q. Ren and J. Li, *Science*, 2022, **377**, 335–339.
- [6] J. Cui, Z. Zhang, L. Yang, J. Hu, A. Jin, Z. Yang, Y. Zhao, B. Meng, Y. Zhou, J. Wang, Y. Su, J. Wang, X. Cui and H. Xing, *Science*, 2023, **383**, 179–183.
- [7] T.-U. Yoon, S. B. Baek, D. Kim, E.-J. Kim, W.-G. Lee, B. K. Singh, M. S. Lah, Y.-S. Bae and K. S. Kim, *Chem. Commun.*, 2013, **54**, 9360–9363.
- [8] X. Zhang, L. Li, J.-X. Wang, H.-M. Wen, R. Krishna, H. Wu, W. Zhou, Z.-N. Chen, B. Li, G. Qian and B. Chen, *J. Am. Chem. Soc.*, 2020, **142**, 633–640.
- [9] X. Zhang, J.-X. Wang, L. Li, J. Pei, R. Krishna, H. Wu, W. Zhou, G. Qian, B. Chen and B. Li, *Angew. Chem. Int. Ed.*, 2021, **60**, 10304–10310.
- [10] J.-X. Wang, X.-W. Gu, Y.-X. Lin, B. Li and G. Qian, *Acs Mater. Lett.*, 2021, **3**, 497–503.
- [11] H. Li, C. Chen, Q. Li, X. J. Kong, Y. Liu, Z. Ji, S. Zou, M. Hong and M. Wu, *Angew. Chem. Int. Ed.*, 2024, **63**, e202401754.
- [12] J. Liu, J. Miao, S. Ullah, K. Zhou, L. Yu, H. Wang, Y. Wang, T. Thonhauser and J. Li, *ACS Mater. Lett.*, 2022, **4**, 1227–1232.
- [13] F.-A. Guo, K. Zhou, J. Liu, H. Wang and J. Li, *Precis. Chem.*, 2023, **1**, 524–529.
